# Supplementary material for: Analysis of the XPA and ssDNA-binding surfaces on the central domain of human ERCC1 reveals evidence for subfunctionalization
Source: PubMed Central journal article supplement — Nucleic Acids Res. 2007 Aug 24;35(17):5789–98. doi: 10.1093/nar/gkm503 (PMC2034474; doi:10.1093/nar/gkm503), 2007-08-24
Supplement: nar_gkm503_1.pdf [file nar_gkm503_1.pdf]

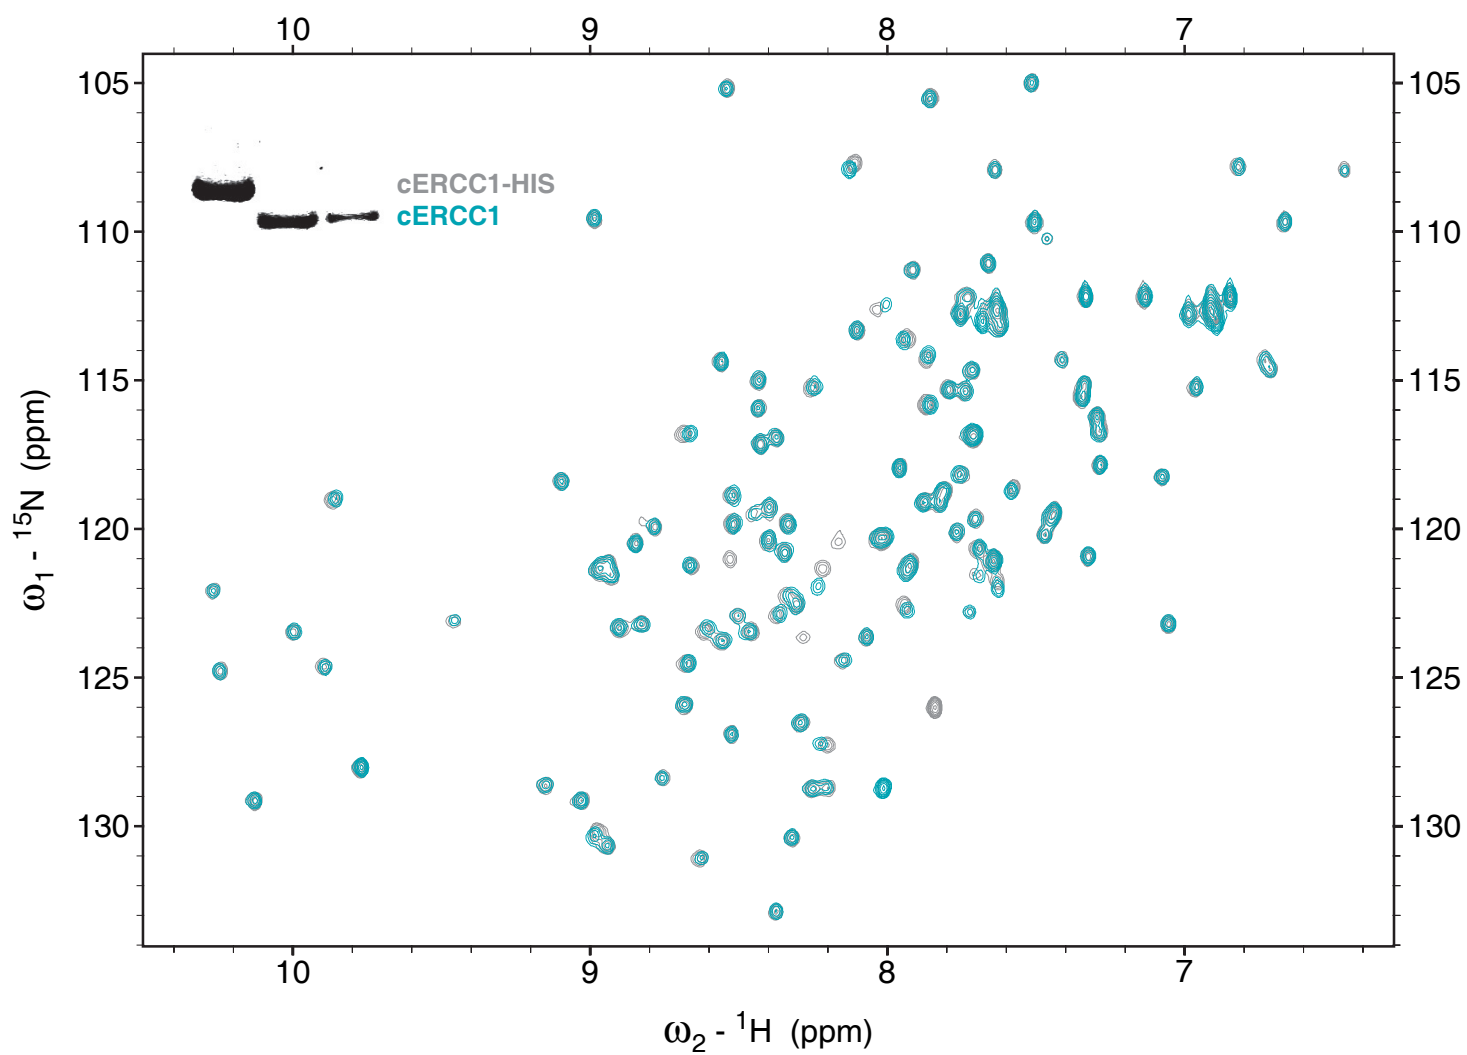

**Supplementary Figure 1.**  $^1\text{H}$  -  $^{15}\text{N}$  HSQC spectra of the C-terminal his-tag cERCC1 (gray) and the corresponding untagged protein (cyan). Inset shows the difference in mass for the two proteins.
